# Supplementary material for: Gold nanoparticle chitosan composite hydrogel beads show efficient removal of methyl parathion from waste water
Source: Royal Society of Chemistry journal article supplement (doi:10.1039/c4ra03870c), 2014-08-15
Supplement: c4ra03870c1.pdf [file c4ra03870c1.pdf]

## Electronic Supplementary Information

### Gold Nanoparticle Chitosan Composite Hydrogel Beads Shows Efficient Removal of Methyl Parathion from Waste Water

Charu Dwivedi\*, Abhishek Gupta, Abhishek Chaudhary, Chayan Kanti Nandi\*

School of Basic Science, Indian Institute of Technology Mandi, Mandi-175001, India

#### Corresponding Authors' names and mailing addresses:

\*Dr. Charu Dwivedi  
e-mail: [charudwived@gmail.com](mailto:charudwived@gmail.com)  
School of Basic Sciences,  
Indian Institute of Technology Mandi,  
Mandi-175001, India  
Tel.: (+) 91-9882688060  
Fax: +91 1905 237942

\*Dr. ChayanKanti Nandi  
E-mail: [chayan@iitmandi.ac.in](mailto:chayan@iitmandi.ac.in)  
Assistant Professor,  
School of Basic Sciences,  
Indian Institute of Technology Mandi,  
Mandi-175001, India  
Tel.: +91 1905 237917  
Fax: +91 1905 237942

**Fig.S1:** UV-Vis spectra of change in absorption intensity of 7  $\mu\text{M}$  MP in the solution after equilibrating with GNP-Gel beads

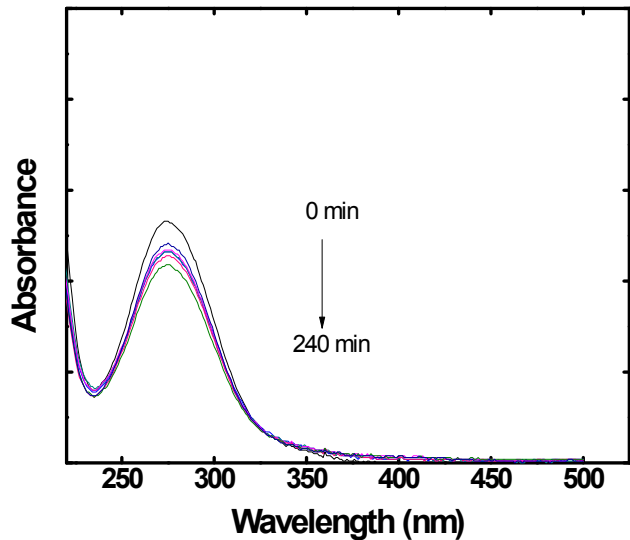

**Fig.S2:** Freundlich isotherm curve for the sorption of MP onto the (a) GNP-Gel and (b) blank gel beads

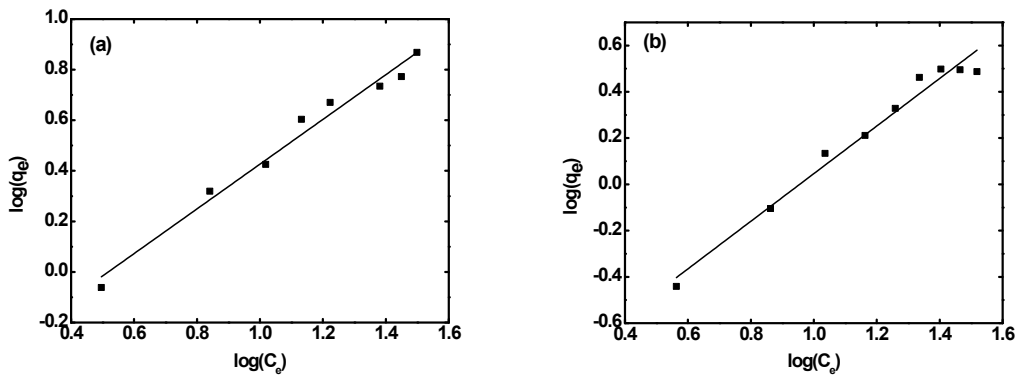

**Fig.S3:** Pseudo first-order kinetics curve for the sorption of MP onto the (a) GNP-Gel and (b) blank gel beads at different initial MP concentrations

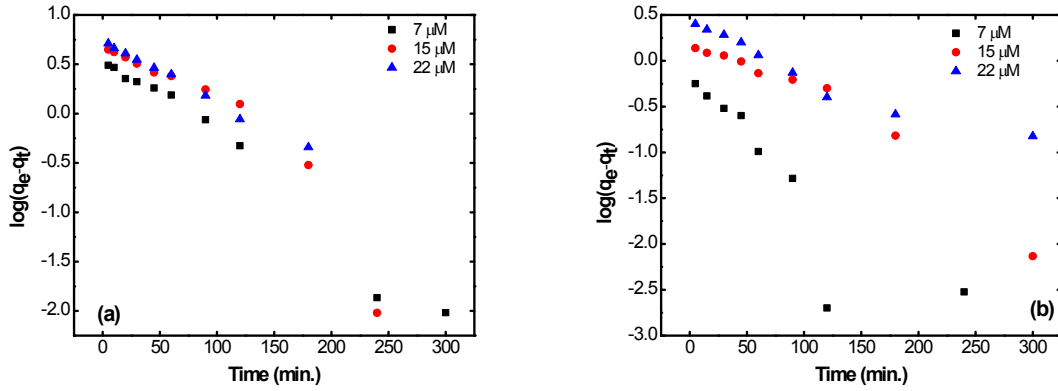

**Fig. S4:** Boyd's diffusion curve for the sorption of MP onto the (a) GNP Gel and (b) blank gel beads at different initial MP concentrations

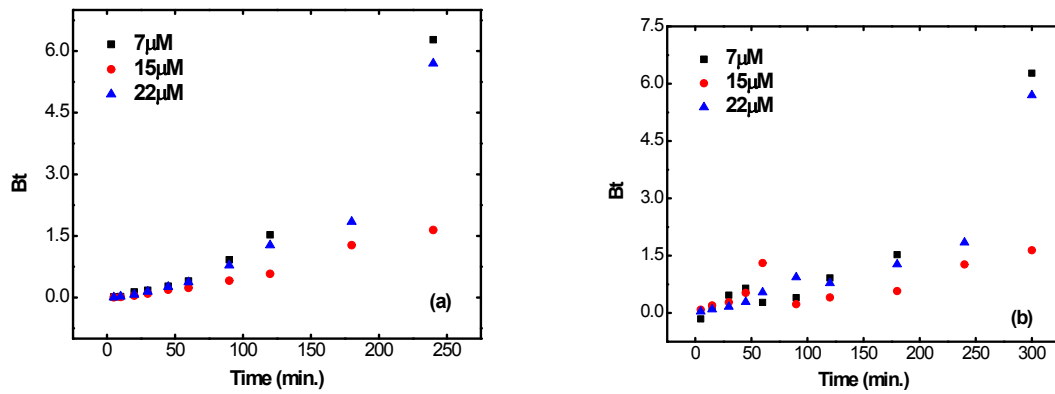

**Table S1:** Freundlich and Langmuir isotherm constants for MP sorption onto GNP Gel and blank gel beads at 293K

| Isotherm   | Sorption Parameters           |               |                 |
|------------|-------------------------------|---------------|-----------------|
|            |                               | GNP-Gel Beads | Blank-Gel Beads |
| Freundlich | $K_F$ ( $\mu\text{mole/g}$ )  | 0.348         | 0.104           |
|            | n                             | 1.131         | 1.011           |
|            | $R^2$                         | 0.965         | 0.972           |
| Langmuir   | $q_m$ ( $\mu\text{mole /g}$ ) | 58.642        | 11.491          |
|            | $K_L$ (L/ $\mu\text{mole}$ )  | 0.005         | 0.008           |
|            | $R^2$                         | 0.994         | 0.992           |

**Table S2:** Kinetic parameters for the sorption of MP onto the blank-gel beads at different initial MP concentrations

| Kinetic model                | Parameters                                         | $C_o$               |                      |                      |
|------------------------------|----------------------------------------------------|---------------------|----------------------|----------------------|
|                              |                                                    | 7 ( $\mu\text{M}$ ) | 15 ( $\mu\text{M}$ ) | 22 ( $\mu\text{M}$ ) |
| Pseudo 1 <sup>st</sup> order | $k_1$ ( $\text{min}^{-1}$ )                        | 0.025               | 0.017                | 0.010                |
|                              | $q_e$ ( $\mu\text{mol g}^{-1}$ )                   | 0.477               | 2.115                | 2.218                |
|                              | $R^2$                                              | 0.745               | 0.939                | 0.912                |
| Pseudo 2 <sup>nd</sup> order | $k_2$ ( $\mu\text{mol}^{-1} \text{min}^{-1}$ )     | 0.064               | 0.008                | 0.007                |
|                              | $q_e$ ( $\mu\text{mol g}^{-1}$ )                   | 0.667               | 2.05                 | 3.46                 |
|                              | $R^2$                                              | 0.995               | 0.962                | 0.986                |
| Intra-particle diffusion     | $K_{id}$ ( $\mu\text{mol}^{-1} \text{mg}^{-1/2}$ ) | 0.519               | 0.129                | 0.310                |
|                              | I ( $\mu\text{mol g}^{-1}$ )                       | 16.94               | 17.14                | 15.52                |
|                              | $R^2$                                              | 0.085               | 0.911                | 0.892                |
